# Supplementary material for: Transcriptome Analysis of Medicinal Plant Salvia miltiorrhiza and Identification of Genes Related to Tanshinone Biosynthesis
Source: PLoS One. 2013 Nov 19;8(11):e80464. doi: 10.1371/journal.pone.0080464 (PMC3834075; doi:10.1371/journal.pone.0080464)
Supplement: Table S4 — Transcription factors that showed higher expression levels in S. miltiorrhiza root. (XLSX) [file pone.0080464.s005.xlsx]

## Sheet: Sheet1
Table S4: Ttranscription factors that showed higher expression levels in S. miltiorrhiza root
Unigene ID	Length	Reads No. in leaf	Reads No. in root	P-Value	FDR	leaf_RPKM	root_RPKM	fold change root/leaf	NR_des	NR_evalue
isotig08108	588	0	80	-9.99718e-16	-1.56392e-12	0	298.923	#DIV/0!	ref|XP_002285705.2| PREDICTED: LOW QUALITY PROTEIN: transcription factor bHLH145-like [Vitis vinifera]	5e-76
isotig10232	517	19	468	1.85794e-116	4.08104e-114	78.3322	1988.85	25.3899	ref|XP_002267008.1| PREDICTED: ethylene-responsive transcription factor RAP2-12-like [Vitis vinifera]	6e-94
isotig08651	569	4	202	3.51933e-56	4.70263e-54	14.9839	779.984	52.0548	ref|XP_002275978.1| PREDICTED: WRKY transcription factor 44-like [Vitis vinifera]	2e-114
isotig09224	551	73	329	7.86134e-42	8.38966e-40	282.389	1311.87	4.6456	gi|332429798|gb|AEE69131.1|GRAS family transcription factor [Citrus medica var. sarcodactylis]	1e-81
isotig09918	524	68	297	5.42899e-37	5.36533e-35	276.602	1245.29	4.50212	dbj|BAF80451.1| MYB-related transcription factor [Nicotiana tabacum]	8e-83
isotig09340	544	58	225	1.0329e-25	8.03993e-24	227.251	908.72	3.99875	gb|AAR92477.1| putative WRKY transcription factor 30 [Vitis aestivalis]	7e-70
isotig02353	1007	5	98	8.09987e-16	4.52148e-14	10.5832	213.817	20.2034	ref|NP_001234229.1| BTF3-like transcription factor [Solanum lycopersicum] gb|ABC24973.1| BTF3-like transcription factor [Solanum lycopersicum]	3e-19
isotig04250	787	6	77	1.13681e-15	6.18439e-14	16.25	214.962	13.2284	gb|ADL36832.1| TCP domain class transcription factor [Malus x domestica]	5e-38
isotig03669	844	0	47	2.41325e-15	1.26457e-13	0	122.349	#DIV/0!	ref|XP_002519248.1| transcription factor. putative [Ricinus communis] gb|EEF43112.1| transcription factor. putative [Ricinus communis]	6e-28
isotig08762	566	10	110	3.54501e-15	1.82044e-13	37.6583	426.995	11.3387	ref|NP_001239972.1| zinc finger protein CONSTANS-LIKE 5-like [Glycine max] gb|ACX42570.1| CONSTANS-like zinc finger protein [Glycine max]	2e-84
isotig04604	760	15	116	4.94071e-15	2.42643e-13	42.0683	335.344	7.97143	ref|XP_003443591.1| PREDICTED: transcription factor IIIA-like [Oreochromis niloticus]	1e-27
isotig08831	563	22	107	6.94298e-15	3.28647e-13	83.2897	417.563	5.01338	ref|NP_001234362.1| GAMYB-like2 [Solanum lycopersicum] gb|ABM53274.1| GAMYB-like2 [Solanum lycopersicum]	1e-169
isotig05714	687	20	90	1.75827e-12	6.89746e-11	62.0512	287.827	4.63854	ref|XP_002267100.2| PREDICTED: zinc finger CCCH domain-containing protein 44-like [Vitis vinifera]	9e-41
isotig08564	561	25	99	2.53735e-12	9.7861e-11	94.9848	387.72	4.08192	ref|XP_002272040.1| PREDICTED: probable WRKY transcription factor 33-like [Vitis vinifera]	5e-153
isotig03147	900	0	35	1.67912e-11	6.05379e-10	0	85.4421	#DIV/0!	gb|ABM55742.1| putative transcription factor Btf3 [Capsicum annuum]	2e-22
isotig08325	578	1	37	8.26068e-11	2.80631e-09	3.68765	140.644	38.1391	ref|XP_002275711.1| PREDICTED: transcription factor ICE1 isoform 1 [Vitis vinifera]	2e-161
isotig01690	1120	0	31	2.85604e-10	9.22373e-09	0	60.8121	#DIV/0!	ref|XP_002890641.1| zinc finger family protein [Arabidopsis lyrata subsp. lyrata] gb|EFH66900.1| zinc finger family protein [Arabidopsis lyrata subsp. lyrata]	1e-33
isotig09988	525	0	27	4.85762e-09	1.37921e-07	0	112.993	#DIV/0!	ref|XP_002276435.1| PREDICTED: zinc finger CCCH domain-containing protein 32 [Vitis vinifera] emb|CBI26091.3| unnamed protein product [Vitis vinifera]	1e-71
isotig02900	931	0	26	9.86479e-09	2.72841e-07	0	61.3578	#DIV/0!	gi|302398567|gb|ADL36578.1|ARF domain class transcription factor [Malus x domestica]	3e-74
isotig13664	405	0	25	2.00333e-08	5.31396e-07	0	135.622	#DIV/0!	ref|XP_003608328.1| Transcription factor bHLH25 [Medicago truncatula] gb|AES90525.1| Transcription factor bHLH25 [Medicago truncatula]	1e-22
isotig02229	1026	0	23	8.26193e-08	2.03187e-06	0	49.2523	#DIV/0!	ref|XP_002529883.1| transcription factor. putative [Ricinus communis] gb|EEF32486.1| transcription factor. putative [Ricinus communis]	4e-23
isotig09321	547	4	34	2.07909e-07	4.82282e-06	15.5865	136.565	8.7617	dbj|BAC53938.1| Myb-like protein [Nicotiana tabacum]	2e-72
isotig13070	428	1	25	2.84414e-07	6.5034e-06	4.98005	128.334	25.7697	ref|XP_003635476.1| PREDICTED: AP2-like ethylene-responsive transcription factor AIL6-like [Vitis vinifera]	5e-47
isotig13524	412	0	21	3.4073e-07	7.62795e-06	0	111.987	#DIV/0!	gb|ADL36671.1| COL domain class transcription factor [Malus x domestica]	2e-34
isotig13494	413	0	20	6.9195e-07	1.47298e-05	0	106.396	#DIV/0!	sp|Q9M573.1|RL31_PERFR RecName: Full=60S ribosomal protein L31 gb|AAF42953.1|AF237624_1 80S ribosomal protein L31 [Perilla frutescens]	7e-55
isotig14519	354	47	102	2.30146e-06	4.55457e-05	282.99	633.058	2.23703	ref|XP_002514597.1| Transcription factor BIM1. putative [Ricinus communis] gb|EEF47703.1| Transcription factor BIM1. putative [Ricinus communis]	2e-38
isotig00628	1484	44	95	5.74814e-06	0.000106709	63.1969	140.649	2.22556	ref|XP_002270843.2| PREDICTED: transcription factor GTE8-like [Vitis vinifera]	2e-55
isotig03854	826	8	36	9.78206e-06	0.000175893	20.6437	95.7566	4.63854	gi|215272920|emb|CAT00686.1|bZIP transcription factor [Antirrhinum majus]	1e-43
isotig08669	569	0	16	1.17688e-05	0.000208289	0	61.7809	#DIV/0!	gi|83582574|dbj|BAE54312.1|transcription factor DcMYB1 [Daucus carota]	6e-43
isotig01745	1107	36	80	1.88798e-05	0.000323259	69.3158	158.777	2.29064	ref|XP_002284994.1| PREDICTED: general transcription factor IIH subunit 2 [Vitis vinifera]	2e-16
isotig11472	483	9	36	2.6169e-05	0.000432257	39.7166	163.758	4.12315	ref|XP_002513360.1| ccaat-binding transcription factor. putative [Ricinus communis] gb|EEF48763.1| ccaat-binding transcription factor. putative [Ricinus communis]	8e-76
isotig10031	521	2	20	4.92485e-05	0.000763906	8.18219	84.341	10.3079	ref|XP_003550153.1| PREDICTED: RING finger and CHY zinc finger domain-containing protein 1-like [Glycine max]	2e-162
isotig04967	735	1	17	5.87427e-05	0.000901148	2.89995	50.8169	17.5234	ref|XP_003633196.1| PREDICTED: general transcription factor IIE subunit 1-like [Vitis vinifera] emb|CBI17757.3| unnamed protein product [Vitis vinifera]	2e-26
isotig11722	475	23	57	7.25369e-05	0.00110483	103.208	263.65	2.55456	ref|NP_001234362.1| GAMYB-like2 [Solanum lycopersicum] gb|ABM53274.1| GAMYB-like2 [Solanum lycopersicum]	2e-60
isotig15035	303	0	13	9.85659e-05	0.00144171	0	94.2643	#DIV/0!	gi|350539617|ref|NP_001233966.1|TCP transcription factor 13 [Solanum lycopersicum]	2e-13
isotig07425	611	0	13	9.85659e-05	0.00144633	0	46.7464	#DIV/0!	ref|XP_002316033.1| GRAS family transcription factor [Populus trichocarpa] gb|EEF02204.1| GRAS family transcription factor [Populus trichocarpa]	4e-17
isotig12786	442	0	13	9.85659e-05	0.00144699	0	64.6201	#DIV/0!	ref|XP_002531852.1| zinc finger protein. putative [Ricinus communis] gb|EEF30530.1| zinc finger protein. putative [Ricinus communis]	3e-53
isotig13741	401	0	13	9.85659e-05	0.00144733	0	71.2271	#DIV/0!	emb|CAA74022.1| bZIP DNA-binding protein [Antirrhinum majus]	6e-19
isotig15512	244	0	13	9.85659e-05	0.00145198	0	117.058	#DIV/0!	gi|224131790|ref|XP_002321179.1|GRAS family transcription factor [Populus trichocarpa]	2e-52
isotig01590	1141	4	23	0.000131811	0.00187871	7.47225	44.2883	5.92703	ref|XP_003529377.1| PREDICTED: transcription factor bHLH113-like [Glycine max]	1e-35
isotig05495	702	2	18	0.000170065	0.00235641	6.07254	56.3355	9.27709	ref|XP_002271716.1| PREDICTED: nuclear transcription factor Y subunit gamma [Vitis vinifera]	9e-43
isotig23493	307	0	12	0.000200166	0.00270284	0	85.8795	#DIV/0!	ref|XP_002303987.1| predicted protein [Populus trichocarpa] gb|EEE78966.1| predicted protein [Populus trichocarpa]	5e-18
isotig13220	412	0	12	0.000200166	0.00270911	0	63.9927	#DIV/0!	dbj|BAA77358.1| DNA-binding protein NtWRKY3 [Nicotiana tabacum]	5e-59
isotig06345	657	9	31	0.000299598	0.00389459	29.1981	103.668	3.55049	ref|XP_002523945.1| transcription factor. putative [Ricinus communis] gb|EEF38432.1| transcription factor. putative [Ricinus communis]	3e-25
isotig05054	725	3	19	0.000374689	0.00480452	8.81983	57.5787	6.52832	gi|289466353|gb|ADC94862.1|MYB transcription factor 1 [Vitis pseudoreticulata]	4e-39
isotig07995	590	0	11	0.000406495	0.00513941	0	40.9626	#DIV/0!	ref|XP_002265612.1| PREDICTED: probable WRKY transcription factor 2-like [Vitis vinifera]	0.0
isotig08369	579	10	32	0.000420921	0.00524426	36.8128	121.428	3.29852	ref|XP_002278700.1| PREDICTED: transmembrane 9 superfamily member 4 isoform 1 [Vitis vinifera]	0.0
isotig07601	607	4	20	0.000697551	0.00829444	14.0459	72.3915	5.15394	ref|XP_002306842.1| AP2/ERF domain-containing transcription factor [Populus trichocarpa] gb|EEE93838.1| AP2/ERF domain-containing transcription factor [Populus trichocarpa]	1e-15
isotig08205	584	0	10	0.000825506	0.00955207	0	37.6213	#DIV/0!	sp|P80461.1|GSHRP_TOBAC RecName: Full=Glutathione reductase. chloroplastic; Short=GR; Short=GRase; Flags: Precursor emb|CAA53925.1| glutathione reductase (NADPH) [Nicotiana tabacum]	0.0
isotig15493	243	0	10	0.000825506	0.00962325	0	90.4149	#DIV/0!	ref|NP_001238287.1| bZIP transcription factor bZIP52 [Glycine max] gb|AAA75414.1| TGACG-motif-binding protein [Glycine max] gb|ABI34645.1| bZIP transcription factor bZIP52 [Glycine max]	6e-63
isotig01861	1068	2	15	0.00105542	0.012043	3.9915	30.8579	7.73091	ref|XP_002515353.1| WRKY transcription factor. putative [Ricinus communis] gb|EEF46802.1| WRKY transcription factor. putative [Ricinus communis]	1e-41
isotig04507	763	3	17	0.001178	0.0129443	8.38058	48.952	5.84113	gi|302399085|gb|ADL36837.1|TCP domain class transcription factor [Malus x domestica]	4e-133
isotig15565	238	15	37	0.00151156	0.0163601	134.336	341.563	2.54261	ref|XP_002268100.2| PREDICTED: transcription factor bHLH61-like [Vitis vinifera] emb|CBI18067.3| unnamed protein product [Vitis vinifera]	2e-46
isotig12619	448	0	9	0.00167643	0.0176501	0	44.1378	#DIV/0!	ref|XP_002281709.1| PREDICTED: AP2/ERF and B3 domain-containing transcription repressor TEM1-like [Vitis vinifera]	6e-76
isotig08289	579	0	9	0.00167643	0.0176675	0	34.1515	#DIV/0!	sp|P41152.1|HSF30_SOLPE RecName: Full=Heat shock factor protein HSF30; AltName: Full=Heat shock transcription factor 30; Short=HSTF 30; AltName: Full=Heat stress transcription factor emb|CAA47870.1| heat stress transcription factor HSF30 [Solanum peruvian	1e-95
isotig13032	432	0	9	0.00167643	0.0178434	0	45.7726	#DIV/0!	ref|XP_002264409.1| PREDICTED: transcription factor bHLH13 [Vitis vinifera]	1e-64
isotig13447	414	0	9	0.00167643	0.0178909	0	47.7627	#DIV/0!	ref|XP_002279385.1| PREDICTED: probable WRKY transcription factor 48 [Vitis vinifera] emb|CBI22862.3| unnamed protein product [Vitis vinifera]	2e-34
isotig10388	513	0	9	0.00167643	0.0179447	0	38.5453	#DIV/0!	gb|ACI62177.1| transcriptional factor WRKY I [Boea hygrometrica]	4e-110
isotig08034	590	2	14	0.00191863	0.0200226	7.22529	52.1342	7.21551	ref|XP_003525203.1| PREDICTED: eukaryotic peptide chain release factor GTP-binding subunit ERF3A-like [Glycine max]	0.0
isotig13804	400	3	16	0.00206855	0.0213888	15.9859	87.8833	5.49753	ref|XP_002523028.1| zinc finger protein. putative [Ricinus communis] gb|EEF39370.1| zinc finger protein. putative [Ricinus communis]	6e-98
isotig13180	426	7	23	0.00253652	0.0252428	35.024	118.622	3.38687	ref|XP_002277716.2| PREDICTED: zinc finger CCCH domain-containing protein 12-like [Vitis vinifera]	2e-65
isotig06969	633	13	32	0.0032786	0.0318905	43.7741	111.069	2.53732	ref|XP_002326164.1| AP2 domain-containing transcription factor [Populus trichocarpa] gb|EEE71834.1| AP2 domain-containing transcription factor [Populus trichocarpa]	5e-57
isotig21855	412	0	8	0.00340447	0.0326104	0	42.6618	#DIV/0!	ref|XP_003544295.1| PREDICTED: zinc finger CCCH domain-containing protein 66-like [Glycine max]	4e-36
isotig15526	242	0	8	0.00340447	0.0327228	0	72.6308	#DIV/0!	gb|ABI34360.1| Zinc finger protein. putative [Solanum demissum]	2e-38
isotig09911	523	0	8	0.00340447	0.0330597	0	33.6074	#DIV/0!	emb|CAC19789.1| MYB-like DNA-binding protein [Catharanthus roseus]	4e-84
isotig02550	976	6	20	0.00466054	0.0418658	13.1032	45.0222	3.43596	ref|XP_002278632.2| PREDICTED: transcriptional activator Myb-like [Vitis vinifera] emb|CBI19947.3| unnamed protein product [Vitis vinifera]	1e-53
isotig13197	425	1	10	0.00543462	0.0479993	5.0152	51.6961	10.3079	ref|XP_002510572.1| zinc finger protein. putative [Ricinus communis] gb|EEF52759.1| zinc finger protein. putative [Ricinus communis]	6e-73
